1 Petrobactin protects against oxidative stress and enhances sporulation efficiency  
2 in *Bacillus anthracis* Sterne

3

4 Ada K. Hagan<sup>1\*</sup>, Yael M. Plotnick<sup>1</sup>, Ryan E. Dingle<sup>1</sup>, Zachary I. Mendel<sup>1</sup>, Stephen R.  
5 Cendrowski<sup>1\*\*</sup>, David H. Sherman<sup>3</sup>, Ashootosh Tripathi<sup>#2</sup>, and Philip C. Hanna<sup>#1</sup>

6

7 <sup>1</sup> Department of Microbiology and Immunology, University of Michigan, Ann Arbor, Michigan,  
8 USA

9 <sup>2</sup> Life Sciences Institute, Department of Medicinal Chemistry, University of Michigan, Ann  
10 Arbor, Michigan, USA

11 <sup>3</sup> Life Sciences Institute, Department of Medicinal Chemistry, Department of Chemistry,  
12 Department of Microbiology and Immunology, University of Michigan, Ann Arbor, Michigan,  
13 USA

14

15 Running Head: *Bacillus anthracis* siderophore enhances sporulation

16

17 Abstract: 197 words

18 Text: 5,319 words

19

20 \* Present address: Journals Department, American Society for Microbiology, Washington, D.C.,  
21 USA

22 \*\* Present address: National Biodefense Analysis and Countermeasures Center, Science and  
23 Technology Directorate, Department of Homeland Security, Frederick, Maryland, USA

24 #Address correspondence to Philip C. Hanna, [pchanna@umich.edu](mailto:pchanna@umich.edu), or Ashootosh Tripathi,  
25 [ashtri@umich.edu](mailto:ashtri@umich.edu).

26

27 **Abstract:**

28

29 *Bacillus anthracis* is a gram-positive bacillus that under conditions of environmental  
30 stress, such as low nutrients, can convert from a vegetative bacillus to a highly durable spore that  
31 enables long-term survival. The sporulation process is regulated by a sequential cascade of  
32 dedicated transcription factors but requires key nutrients to complete, one of which is iron. Iron  
33 acquisition by the iron-scavenging siderophore petrobactin is the only such system known to be  
34 required for vegetative growth of *B. anthracis* in iron-depleted conditions, *e.g.*, in the host.  
35 However, the extent to which petrobactin is involved in spore formation is unknown. This work  
36 shows that efficient *in vitro* sporulation of *B. anthracis* requires petrobactin, that the petrobactin  
37 biosynthesis operon (*asbA-F*) is induced prior to sporulation, and that petrobactin itself is  
38 associated with spores. Petrobactin is also required for both oxidative stress protection during  
39 late stage growth and wild-type levels of sporulation in sporulation medium. When considered  
40 with the petrobactin-dependent sporulation in bovine blood also described in this work, these  
41 effects on *in vitro* growth and sporulation suggest that petrobactin is required for *B. anthracis*  
42 transmission via the spore during natural infections in addition to its key functions during active  
43 anthrax infections.

44 **Importance:**

45

46 *Bacillus anthracis* causes the disease anthrax, which is transmitted via its dormant, spore  
47 phase. However, converting from bacilli to spore is a complex, energetically costly process that  
48 requires many nutrients including iron. *B. anthracis* requires the siderophore petrobactin to

49 scavenge iron from host environments. We show that in the Sterne strain, petrobactin is required  
50 also for efficient sporulation, even when ample iron is available. The petrobactin biosynthesis  
51 operon is expressed during sporulation, and petrobactin is biosynthesized during growth in high  
52 iron sporulation medium but instead of being exported, the petrobactin remains intracellular to  
53 protect against oxidative stress and improve sporulation. It is also required for full growth and  
54 sporulation in blood (bovine), an essential step for anthrax transmission between mammalian  
55 hosts.

56 **Introduction:**

57 *Bacillus anthracis* is a gram-positive, spore-forming bacillus, which causes the disease  
58 anthrax. In humans, anthrax can manifest in four ways depending on the route of exposure to *B.*  
59 *anthracis* spores: cutaneous, inhalational, gastrointestinal, or injectional (1, 2). Following aerosol  
60 exposure, the spores, a metabolically dormant form of *B. anthracis*, are taken up by antigen  
61 presenting cells (APCs) such as macrophages and dendritic cells (3, 4). While associated with  
62 APCs, a set of small molecules from the host initiate germination of spores into vegetative bacilli  
63 (3). The bacilli rapidly initiate cellular functions and within 30 minutes begin transcription and  
64 translation of required proteins, including the toxins that both enable escape from the APC and  
65 cause anthrax pathologies (5). If the APC is in transit to proximal lymph nodes when escape  
66 occurs, the bacilli are released directly into the blood or lymph to replicate, quickly reaching  
67 titers greater than  $10^8$  CFU/mL (6, 7).

68 The *B. anthracis* spore is the infectious particle for its role in anthrax transmission, and a  
69 dormant structure enabling survival of harsh conditions including: nutrient deprivation, extreme  
70 temperatures, radiation, and desiccation (6, 8–11). As nutrients diminish and cell density  
71 increases, environmental sensors initiate a cascade of transcriptional regulators to construct a  
72 spore from both the inside out and the outside in (12–14). Most of the research describing  
73 sporulation has been conducted in *B. subtilis* and will be described in brief here (see 10 for a  
74 recent review).

75 The first morphological change observed during sporulation is asymmetric division of a  
76 bacillus into the mother cell and prespore compartments, which is initiated by phosphorylation of  
77 the transcriptional regulator Spo0A and activation of the sporulation-specific sigma factor  $\sigma^H$   
78 (12, 15, 16). The next step in transcriptional regulation is the compartmentalized activation of

79 two early sporulation sigma factors,  $\sigma^F$  and  $\sigma^E$ , in the prespore and mother cell, respectively (12).  
80 A suite of  $\sigma^F$ - and  $\sigma^E$ -dependent proteins enable engulfment of the prespore by the mother cell in  
81 the second major morphological change (12, 17). Final maturation of the spore is regulated by  
82 the prespore-specific  $\sigma^G$  and the mother-cell-specific  $\sigma^K$  (12, 18, 19). When completed, the spore  
83 structure is composed of a dehydrated core, containing the genome and silent transcriptional and  
84 translational machinery, surrounded by an inner membrane; a layer of modified peptidoglycan  
85 known as the cortex; an outer membrane; a proteinaceous spore coat; and, for *B. anthracis*, the  
86 exosporium (9, 12, 14).

87 Sporulation is an energetically costly process. While sporulation is initiated by nutrient  
88 depletion, efficient sporulation still requires access to many nutrients, including large amounts of  
89 iron (1.5-2mM) (20, 21). Iron is required as a cofactor for enzymes requiring electron transfer  
90 such as those involved in environmental sensing, ATP synthesis, and the tricarboxylic acid cycle  
91 (22). To scavenge iron from the environment during low iron availability, many bacteria can  
92 synthesize small molecules called siderophores. In iron-replete conditions, however,  
93 siderophores and other iron acquisition systems are repressed by the ferric uptake repressor Fur,  
94 or a similar system. Fur is a dual iron and DNA-binding protein. In the iron-bound form, Fur  
95 tightly binds sequences known as Fur-boxes thus repressing transcription of any downstream  
96 genes. Low-iron stress causes the iron to be shunted from Fur to essential cellular processes,  
97 which de-represses Fur-regulated genes allowing for expression of iron acquisition systems (23,  
98 24).

99 While iron is essential, excess free iron is toxic to the cell, which thus requires dedicated  
100 proteins to prevent the formation of superoxide radicals via participation of iron in the Fenton  
101 reaction. Iron in *B. anthracis* is sequestered by ferritins, the mini-ferritin DPS, and superoxide

102   dismutases (25, 26). These proteins contribute to iron storage in *B. anthracis* spores (~10 $\mu$ M),  
103   which is presumed to be required for outgrowth from the spore in iron-limiting conditions (*e.g.*,  
104   within an APC endosome), until active iron acquisition systems can be expressed one to two  
105   hours following germination (27, 28). One such system is the siderophore petrobactin, whose  
106   biosynthetic machinery is encoded by the *asb* operon and is induced within two hours of  
107   germination (27, 29).

108         *B. anthracis* has three known active iron acquisition systems: two siderophores,  
109   petrobactin and bacillibactin, and a heme acquisition system. Of the three systems, only  
110   petrobactin is required for growth in macrophages and virulence in a murine inhalational anthrax  
111   model (29, 30). Previous studies have elucidated much about petrobactin use in *B. anthracis*  
112   including defining: the biosynthetic pathway for petrobactin (*asb* operon), the petrobactin-iron  
113   complex receptor (FhuA), import permeases (FpuB/FatC/FatD), ATPases (FpuC/FatE), and the  
114   petrobactin exporter (ApeX) (29, 31–34). However, previous studies have also suggested that  
115   the *asb* operon may be regulated by environmental conditions other than iron (35, 36). In the  
116   current work, we investigated whether petrobactin-dependent iron acquisition plays a role in  
117   aspects of *B. anthracis* Sterne spore biology and the associated regulation of *asb*.

118 **Results:**

119 **Petrobactin is required for sporulation but not germination.** Spores cannot be infectious  
120 particles without first germinating to the vegetative state, so to begin evaluating the role of  
121 petrobactin in spore biology, initial experiments investigated the effect of petrobactin on  
122 germination in low-iron conditions. To observe germination kinetics, spores of wild-type *B.*  
123 *anthracis* Sterne, an *asb* (petrobactin-null) mutant strain, and a *dhb* (bacillibactin-null) mutant  
124 strain were incubated in iron-depleted medium supplemented with 1mM inosine (IDM+I) for one  
125 hour. The *asb* mutant did not display a defect in germination, relative to either wild-type or *dhb*  
126 mutant spores (Figure 1A).

127 To further explore our hypothesis that petrobactin plays a role in spore biology, we tested  
128 the ability of an *asb* mutant strain and a *dhb* mutant strain to sporulate relative to wild-type. At  
129 12 and 36 hours of growth in sporulation medium, colony forming units per mL (CFU/mL) were  
130 enumerated to determine total and sporulated counts. Despite an abundance of ferrous iron  
131 (1.7mM) in the medium and growth to  $10^7$  CFU/mL (Figure 1B), less than  $10^6$  CFU/mL (~10%)  
132 of the *asb* mutant strain population had sporulated (Figure 1C). That was nearly two log fewer  
133 spores than the wild-type and *dhb* mutant strains whose spore populations exceeded  $10^7$  CFU/mL  
134 at 12 hours post-inoculation (Figure 1C). This defect in sporulation by the *asb* mutant strain was  
135 not observed at 36 hours post-inoculation, suggesting the petrobactin phenotype is kinetic. As a  
136 control, the defect was rescued at 12 hours by supplementing the *asb* mutant strain with 25 $\mu$ M of  
137 purified petrobactin at inoculation (Figure 1B, 1C). Since sporulation of the *asb* mutant strain  
138 can be complemented *in trans* with purified petrobactin, these data suggest that petrobactin is  
139 biosynthesized and that the *asb* operon is expressed prior to spore formation in this growth  
140 condition, despite the presence of high iron levels.

141           **The *asb* operon is transcribed and translated during late stage growth and early**  
142 **sporulation.** To understand how *asb* might be expressed despite iron levels capable of  
143 suppressing expression during vegetative growth, we used the database of transcriptional  
144 regulation in *Bacillus subtilis* (DBTBS) prediction tool to search the 500bp upstream of *asbA* for  
145 putative sigma factor binding sites (37). There were potential consensus binding sites for two  
146 sporulation-specific sigma factors ( $\sigma^G$  and  $\sigma^K$ ), the general stress transcription factor  $\sigma^B$  and the  
147 oxidative stress response regulator PerR encoded in this region, all identified with at least 95%  
148 confidence (Figure 2A). This suggests that (an) alternative regulation system(s) may be active  
149 during sporulation and could be responsible for the petrobactin-dependent sporulation  
150 phenotype. To characterize expression of the operon, we generated fluorescent reporters. Two  
151 reporter constructs for the *asb* operon, one transcriptional and one translational, were generated  
152 by fusing the 500bp upstream of *asb* and the first eight codons of *asbA* (Figure 2A,  
153 underlined)—either separated by a ribosomal binding site (transcriptional) or directly  
154 (translational)—to the green fluorescent protein allele *gfpmut3a* (38). To facilitate wildtype-like  
155 expression of the reporters, each was inserted on the *B. anthracis* genome immediately  
156 downstream of the *asbF* transcriptional terminator by allelic exchange.

157           To measure reporter expression, strains of the transcriptional and translational reporters,  
158 along with the wild-type strain, were grown in sporulation medium with shaking for 12 hours  
159 and the OD<sub>600</sub> and GFP fluorescence measured every five minutes. The transcriptional and  
160 translational reporter strains both grew identically to the wild-type strain (Figure 2B) and the  
161 calculated RFUs indicate that *asb* is both transcribed and translated during stationary phase  
162 growth in sporulation medium (Figure 2B, black arrows).



163           After observing that the *asb* operon is expressed during late stage growth in sporulation  
164 medium, we next sought to determine if any of the predicted sporulation sigma factors were  
165 required for *asbA-F* expression. Here, we used plasmid-based transcriptional reporter constructs  
166 where the 260bp upstream of *asbA* (Figure 2A, vertical line) were fused to *gfpmut3α*, cloned into  
167 the pAD123 expression vector, and expressed in a wild-type *B. anthracis* Sterne background.  
168 This construct lacks the predicted binding sites for sporulation-specific sigma factors  $\sigma^G$  and  $\sigma^K$   
169 but retains predicted binding sites for Fur,  $\sigma^B$ , and PerR (Figure 2A).

170           To measure expression of *asbA-F* by this construct, strains of wild-type, the  
171 transcriptional reporter, and a promoter-less *gfpmut3α* were grown in sporulation medium as  
172 described and the RFUs were similarly calculated. Overall growth kinetics were similar and the  
173 260bp *asb* promoter was sufficient for *asb* transcription during late stage growth (Figure 2C,  
174 black arrow). The observed increase in RFU for Figure 2B versus 2C is likely an artifact from  
175 increased copy numbers of plasmid-based reporters. Together these data suggest that the high  
176 iron levels in the sporulation medium do fully repress the *asb* operon by Fur and that sporulation-  
177 specific sigma factors are not required for expression of *asbA-F* during these conditions.

178           Given these conclusions, we next wanted to better understand the population dynamics  
179 and kinetics for *asb* expression relative to sporulation. The chromosome-based translational  
180 reporter and wild-type strains grown in sporulation medium were imaged with phase-contrast  
181 and fluorescence microscopy at six, eight, ten, and 12 hours post-inoculation. Individual bacilli  
182 were scored for Gfpmut3α expression (positive is at least 1.4x above background fluorescence)  
183 and sporulation (if they contained phase bright spores) (representative images in Figure 3B-E, for  
184 wild-type see Supplementary Figure 1). At six hours of growth, 100% of the translational  
185 reporter cells were fluorescent, thus expressing the *asb* operon (Figure 3A-B). The number of

186 fluorescent bacilli decreased over time, with 80% of the population expressing *asb* at eight hours  
187 of growth and only 20% at 10 hours of growth (Figure 3A, 3C-D). No bacteria were scored as  
188 fluorescent at the 12-hour time point (Figure 3A, 3E). Phase bright spores were not observed  
189 until ten hours post-inoculation, at which point spores were present in 65% of bacilli (Figure 3A,  
190 3D). At 12 hours post-inoculation, 90% of the population were either sporulating or mature, free  
191 spores (Figure 3A, 3E). Together with the data from Figure 2B-C, these data indicate that *asb*  
192 expression peaks and terminates before maturation to phase-bright spores and likely before the  
193 onset of sporulation (especially given the long half-life of Gfpumut3 $\alpha$ ).

194         These observations confirm that *asb* expression does not require sporulation-specific  
195 sigma factors during sporulation (Figure 2C), particularly since both  $\sigma^G$  and  $\sigma^K$  are active during  
196 the later stages of sporulation by which point fluorescence has markedly declined, probably due  
197 to either degradation or protein dilution due to cell division. So, while petrobactin does not  
198 appear to be required for the process of sporulation *vis a vis* sporulation-specific regulation of  
199 *asb*, it is required for efficient sporulation and since cell stress precedes sporulation, *asb*  
200 expression may be induced by a stress response regulator such as  $\sigma^B$  or PerR.

201

202         **During sporulation, petrobactin is not exported, remains associated with the spore**  
203 **and is protective against oxidative stress.** The petrobactin requirement for efficient sporulation  
204 and the upregulation of *asbA-F* during this period suggest that petrobactin is synthesized and  
205 may be present in the culture medium. However, the petrobactin-specific catechol moiety 3,4-  
206 dihydroxybenzoate, was not detected in sporulation medium at 12 hours post-inoculation by the  
207 colorimetric catechol assay (data not shown). This could be due to either assay interference by  
208 the medium, petrobactin levels below the limit of detection, or suggest an intracellular role for

209 petrobactin. To confirm petrobactin biosynthesis and address these possibilities, we used laser  
210 ablation electron spray ionization mass spectroscopy (LAESI-MS) to detect petrobactin both in  
211 the spent culture medium and the cell pellets of *B. anthracis* wild-type and *asb* mutant strains  
212 grown in sporulation medium for 12 hours (33). When compared against our negative control,  
213 the petrobactin-null *asb* mutant strain, LAESI-MS confirmed the catechol assay results as it did  
214 not detect petrobactin in the spent culture medium from the wild-type strain (Figure 4A),  
215 indicating no discernable export of this siderophore took place. However, petrobactin was  
216 detected in cells of the wild-type strain thus confirming synthesis (Figure 4A).

217         The use of petrobactin intracellularly might result in association of petrobactin with the  
218 *B. anthracis* Sterne spore so we also subjected wild-type and *asb* mutant strain spores to LAESI-  
219 MS (n=3) analysis. This experiment detected petrobactin in wild-type, but not *asb* mutant strain  
220 spores (Figure 4B). This phenotype could be restored by supplementing growth and sporulation  
221 of the *asb* mutant strain with 25 $\mu$ M of purified petrobactin (n=1). Complete ablation of the  
222 spores was confirmed by an abundance of the spore-core-component calcium dipicolinic acid in  
223 the chromatograph (data not shown). These data indicate that while petrobactin is not exported  
224 into the medium at detectable levels, it is biosynthesized but remains associated with the spore.

225         To this point in our studies, the mechanism of *asb* expression and role for petrobactin  
226 biosynthesis in sporulation remains unclear. Binding sites for *asbA-F* regulators in the plasmid-  
227 based *asb* transcriptional reporter include PerR, an oxidative stress response regulator, and  $\sigma^B$ , a  
228 general stress response regulator (Figure 2A). In *B. subtilis*,  $\sigma^B$  is active during early sporulation,  
229 but is not required for either sporulation or an oxidative stress response, likely since most  $\sigma^B$ -  
230 regulated genes can be activated by other transcription factors (40, 41). However, Lee et al.,  
231 found that oxidative stress can induce petrobactin expression and synthesis, even in high iron

232 conditions (35). While sporulation is not known to be preceded by oxidative stress, *B. subtilis*  
233 cells become resistant to oxidative stress upon entry to the stationary phase (41–43).  
234 Additionally, oxidative stress protective enzymes are induced during late stage growth of *B.*  
235 *anthracis*, maintained during sporulation, and two superoxide dismutases become incorporated in  
236 the exosporium (27, 28). Taken together with evidence of intracellular petrobactin, we predicted  
237 that petrobactin is protective against oxidative stress.

238 To test this hypothesis, wild-type, *asb* mutant  $\pm$  25 $\mu$ M petrobactin, and *dhb* mutant  
239 strains were tested for resistance to the oxidative stressor hydrogen peroxide (H<sub>2</sub>O<sub>2</sub>) at eight  
240 hours of growth (i.e., before sporulation) in sporulation medium. Percent survival was calculated  
241 by comparing the treated CFU/mL (those exposed to 10mM H<sub>2</sub>O<sub>2</sub>) to untreated CFU/mL (water).  
242 While about 50% of the wild-type and the *dhb* mutant strain populations survived oxidative  
243 stress exposure, less than 1% of the *asb* mutant strain population survived (Figure 4D). This was  
244 due to a four-log decrease in the CFU/mL of the *asb* mutant strain following treatment with  
245 10mM H<sub>2</sub>O<sub>2</sub> (Figure 4C). The defect in survival was rescued by supplementation of the *asb*  
246 mutant strain with 25 $\mu$ M of purified petrobactin to the medium at the time of inoculation (Figure  
247 4C, 4D). These data confirm our hypothesis that petrobactin is protective against oxidative stress  
248 during stationary phase—but prior to sporulation—in sporulation medium, which likely supports  
249 efficient sporulation and thus transmission between mammalian hosts.

#### 250 **Petrobactin is preferred for rapid growth and sporulation in bovine blood.**

251 Following death of an infected mammal, blood laden with *B. anthracis* is exposed to the  
252 atmosphere by either hemorrhagic draining or the activity of scavengers on the carcass (11, 44,  
253 45). Since vegetative bacilli are not easily infectious, *B. anthracis* transmission requires  
254 sporulation in aerated blood, a process triggered when the blood-borne CO<sub>2</sub> reported to suppress

255 sporulation decreases following death, thus triggering the sporulation cascade in a race against  
256 decomposition (44). Experiments to test *in vivo* sporulation are ethically and technically  
257 challenging, so to determine the relevance of each iron acquisition system—petrobactin, hemin,  
258 and bacillibactin—to disease we measured sporulation in bovine blood. Cultures of wild-type *B.*  
259 *anthracis* Sterne, the *asb* mutant, the *dhb* mutant, and the *isd* mutant strain (a mutant in hemin  
260 utilization) were grown in defibrinated bovine blood with shaking for three days. Every 24 hours,  
261 the total and sporulated CFU/mL were enumerated.

262         Compared to wild-type at 24 hours, growth of the *asb* mutant strain was reduced by one  
263 log (Figure 5A) with two log fewer spores (Figure 5B) whereas all other strains—the *isd* and the  
264 *dhb* mutant strains—had equivalent CFU/mL. While percent sporulation at 24 hours is low,  
265 generally < 25%, most sporulation in the wild-type strain appears to occur during the first 24  
266 hours of incubation, after which non-sporulated cells begin to die thus reducing the total  
267 CFU/mL and increasing percent spores. Conversely, the *asb* mutant strain demonstrated delayed  
268 sporulation, gaining an additional log of spores between the 24 and 48-hour timepoints, but the  
269 percent sporulation at 48 hours and 72 hours was < 25% compared to the wild-type strain at 80%  
270 (Figure 5C). Percent sporulation for both the *isd* mutant strain and the *dhb* mutant strain were  
271 about 50%, though these were not statistically significant from the wild-type strain (Figure 5C).  
272 Additionally, both total and spores CFU/mL for both the *isd* and the *dhb* mutant strains were like  
273 wild-type, suggesting that petrobactin is a preferred iron gathering system during growth in  
274 bovine blood (Figure 5A, 5B).

275         The growth defect and delayed sporulation of the *asb* mutant strain could be due to  
276 oxidative stress, a lack of available iron, or a combination of the two stresses. To separate the  
277 effects of petrobactin supplementation on iron acquisition and protection from oxidative stress,

278 the *asb* mutant strain was supplemented with 25 $\mu$ M of either petrobactin or hemin (n=2). Hemin  
279 is the oxidized form of heme, which is released into blood by the lysis of red blood cells and can  
280 be bound by *B. anthracis* hemophores, making it biologically relevant (46, 47). However, hemin  
281 isn't known to protect against intracellular oxidative stress, so we predicted that if petrobactin  
282 were only required for iron acquisition, then hemin supplementation should complement the *asb*  
283 mutant strain phenotype.

284         Supplementation of the *asb* mutant with hemin did not affect overall growth but appeared  
285 to enhance early sporulation whereas supplementation with petrobactin rescued both growth and  
286 sporulation (Figure 5A-C). These data suggest that the iron provided via hemin may allow for  
287 efficient sporulation while the dual benefits of petrobactin iron acquisition plus protection from  
288 oxidative stress enable continued growth prior to the onset of sporulation.

289 **Discussion:**

290 In this work, we show that petrobactin is not required for *B. anthracis* Sterne germination  
291 (Figure 1A) but is required for efficient sporulation in sporulation medium (Figure 1B). Using  
292 fluorescent *asbA:gfpmut3α* reporter fusions, we also show that *asb* is both transcribed and  
293 translated during late stage growth of *B. anthracis* Sterne prior to sporulation in a sporulation-  
294 sigma-factor independent manner (Figure 2B-C, 3). Unlike during vegetative growth, petrobactin  
295 is not exported during sporulation but remains intracellular (Figure 4A) where it has a significant  
296 role in protecting against oxidative stress (Figure 4C-D) and eventually associates with the spore  
297 (Figure 4B). These findings may have relevance to transmission since petrobactin is also  
298 required for efficient sporulation in bovine blood (Figure 5), a pre-requisite for survival and  
299 transmission of the pathogen (11, 44). We believe this to be the first demonstration that a  
300 siderophore is induced in preparation for sporulation and present in the mature spore.

301 The iron-gathering capacity of siderophores has long been appreciated for their role in  
302 pathogenicity and since their discovery, evidence for alternate functions has accumulated.  
303 Multiple reports have demonstrated roles for siderophores in: cell signaling, sporulation  
304 initiation, protection from copper and oxidative stress, the generation of oxidative stress against  
305 competitors, and, most recently, in survival via spores (48, 49).

306 In early 2017, Grandchamp et. al showed with *B. subtilis* that siderophore  
307 supplementation (including with the native bacillibactin) caused the onset of sporulation to occur  
308 earlier (49). Since this enhancement required import of the siderophore into the bacterial cell and  
309 iron removal by corresponding hydrolases, these authors hypothesized that the extra intracellular  
310 iron acted as a signal for the onset of sporulation (49). However, their study did not address  
311 bacillibactin regulation, export during sporulation, nor the cell stresses associated with

312 sporulation. So, to our knowledge, this is the first demonstration that a siderophore is induced to  
313 protect against oxidative stress prior to sporulation in high iron conditions.

314         As noted in the introduction, siderophores are primarily regulated by the iron-dependent  
315 repressor Fur. However, some siderophores, such as petrobactin, are biosynthesized in response  
316 to oxidative stress conditions and other catecholate-containing siderophores (*e.g.*, enterobactin  
317 and salmochelin) are protective against reactive oxygen species (35, 50–55). This protection is  
318 not due to iron sequestration that prevents additional Fenton reactions but is a function of the  
319 antioxidant properties of catechols (50, 53). Supplementation with free catechols doesn't rescue  
320 the protective function of enterobactin, which requires import and hydrolysis for effective  
321 oxidative stress protection (53, 54). It is unclear whether petrobactin requires additional  
322 processing to become active against oxidative stress, though the detection of petrobactin  
323 associated with spores by mass spectrometry suggests it does not.

324         There are two non-exclusive hypotheses for siderophore upregulation during oxidative  
325 stress: one, that superoxide radicals oxidize iron co-factors thus inactivating key enzymes and  
326 two, that upregulation of the enzymes to mitigate oxidative stress require metallic (*e.g.*, iron and  
327 manganese) co-factors. Both of these would reduce the intracellular iron pool and thereby relieve  
328 iron from Fur to enable iron acquisition system expression (35, 51). In the case of *Bacillus* spp.,  
329 the intracellular iron pool is further depleted during the onset of sporulation due to upregulation  
330 of aconitase, an iron-rich citrate isomerase and stabilizer of  $\sigma^K$ -dependent gene transcripts (56,  
331 57).

332         While the demand for iron during oxidative stress and/or sporulation may relieve  
333 negative regulation by Fur, it is likely that *asbA-F* expression is induced by an oxidative stress  
334 regulator such as PerR. Enterobactin is positively regulated by the oxidative stress response and



335 there is compelling evidence linking *Azotobacter vinelandii* catecholate siderophores to similar  
336 regulation (53–55). The observed phenotype for those siderophores is similar to that observed by  
337 Lee et al. for petrobactin: high iron repression of the siderophore can be overcome by oxidative  
338 stress (35, 53, 55). Petrobactin biosynthesized within the cell may then become randomly  
339 associated with the prespore. More work is needed to better characterize regulation of the *asb*  
340 operon and petrobactin biosynthesis.

341 As growth in blood marks an endpoint for an anthrax infection, the bacilli must not only  
342 grow well, but also prepare for survival and transmission between hosts. Evidence in the  
343 literature suggests that exposure of blood-borne bacilli to oxygen as a dying host bleeds out  
344 begins the signaling cascade for sporulation creating a direct link between growth and  
345 sporulation in blood and transmission (11, 44). It's known that petrobactin is required for growth  
346 in macrophages and iron-depleted medium, but that requirement had not been demonstrated for  
347 growth or sporulation in blood prior to these experiments. Our data suggest that petrobactin is the  
348 preferred iron acquisition system for growth and sporulation in bovine blood, despite multiple  
349 potential iron sources. While, petrobactin was required to achieve wild-type growth of  $10^8$   
350 CFU/mL in blood, the *asb* mutant was still able to grow to  $10^7$  CFU/mL suggesting that another  
351 iron acquisition source was functioning, likely either the *isd* system or bacillibactin. More work  
352 is needed to fully understand the contributions of each iron system to growth and sporulation and  
353 to verify these findings in other *B. anthracis* strains.

354 These data update the model of *B. anthracis* Sterne iron acquisition and sporulation  
355 (Figure 6). In this model, upon entry of the bacterial population into late stage growth,  
356 environmental stressors both deplete the intracellular iron pool and induce oxidative stress that  
357 act to upregulate the *asb* operon, presumably through PerR regulation. Petrobactin is

358 biosynthesized for iron acquisition and/or protection against oxidative stress, which support the  
359 bacillus as it transitions into sporulation. Either direct import of petrobactin into the prespore or  
360 random association results in packaging of petrobactin into the spore. These findings underscore  
361 the vital role of petrobactin in the many stages of *B. anthracis* infection, from survival in the  
362 macrophage to growth in the bloodstream and now, sporulation, which facilitates transmission to  
363 a new host.

364

365 **Materials and Methods:**

366 **Bacterial growth conditions and sporulation:** Strains used are described in Supplementary  
367 Table 1. Genomic-based fluorescent reporters were generated by PCR amplification and Gibson  
368 cloning (New England Biolabs) of the genetic construct into pBKJ258 which was then inserted  
369 onto the *Bacillus anthracis* Sterne 34F2 (pXO1<sup>+</sup>, pXO2<sup>-</sup>) genome by allelic exchange, as  
370 described by Janes and Stibitz (58). The plasmid-based transcriptional reporter was directionally  
371 cloned with EcoRI and BamHI into the pAD123 multiple cloning site upstream of the  
372 promoterless *gfpmut3a*. All necessary primers are listed in Supplementary Table 2. Modified G  
373 medium (ModG) was used for the generation of *B. anthracis* spores at 37°C for 72 hours (59).  
374 Spores were collected at 2,800 rpm then washed and stored in sterile water at room temperature  
375 following heat activation at 65°C. Strains containing plasmid-based reporters (39) were grown in  
376 the presence of 10µg/mL chloramphenicol. Media and chemicals were purchased from Fisher  
377 Scientific or Sigma Aldrich.

378  
379 **Spore germination:** Spore germination was measured in iron-depleted medium (IDM)  
380 supplemented with 1mM inosine, following a 20 minute heat activation at 65°C (29). To measure  
381 germination and subsequent outgrowth, spores were inoculated at a starting OD<sub>600</sub> between 0.25  
382 and 0.5 for a final volume of 200µL (n=3). The spores were incubated at 37°C in a SpectraMAX  
383 M2 spectrophotometer and the OD<sub>600</sub> measured every five minutes for one hour. Data are  
384 representative of three independent experiments and are presented as percent of the initial OD<sub>600</sub>.

385  
386 **Supplementation of *asb* mutant sporulation with petrobactin and outgrowth:** To supplement  
387 *asb* mutant spores with petrobactin, bacilli were grown overnight at 30°C in BHI (Difco)

388 inoculated 1:1000 in 25mL of ModG medium supplemented with 25 $\mu$ M of purified petrobactin.  
389 After a 72-hour incubation, spores were collected by centrifugation at 2,800rpm and washed  
390 three times with 20mL of sterile, deionized water. The spores were resuspended in 1mL of water  
391 following heat activation for 20 minutes at 65°C.

392

393 **Reporter growth, measurement, and analysis:** Bacterial strains were plated on BHI and grown  
394 in BHI at 30°C overnight. Overnight cultures were back diluted 1:50 into fresh BHI and  
395 incubated at 37°C for one hour. The cells were pelleted at 2,800 rpm for 10 minutes (Centrifuge  
396 5810 R, Eppendorf), washed once with BHI then used to inoculate 200 $\mu$ L of ModG medium.  
397 Each strain was inoculated into triplicate wells of a 96-well plate to a starting OD<sub>600</sub> of 0.05,  
398 covered with a gas permeable sealing membrane (Breathe-Easy, Diversified Biotech) then grown  
399 in a Synergy HTX plate reader at 37°C with continuous shaking at 237cpm for 12 hours. The  
400 OD<sub>600</sub> and fluorescence (excitation 485/20, emission 528/20) were bottom-read every five  
401 minutes using a tungsten light source. Data were analyzed in R software by first subtracting a  
402 media blank from both fluorescence and OD<sub>600</sub> then normalizing fluorescence by the OD<sub>600</sub> (60).  
403 Background fluorescence was approximated by wild-type cells and subtracted from the reporters  
404 at corresponding timepoints.

405

406 **Microscopy:** Wild-type and the *asb* translational reporter expressing Gfpmut3 $\alpha$  were grown in  
407 ModG medium at 37°C and every two hours from six to 12 hours post-inoculation, five  $\mu$ L was  
408 spotted on a microscope slide. At least 100 bacteria were imaged at each timepoint scored for  
409 fluorescence and/or sporulation. Bacteria were counted by determining the size of a bacterium  
410 and calibrating all images to this length. A bacterium was scored as positive for fluorescence if

411 the intensity was at least 1.4x above the background fluorescence of wild-type, non-Gfpmut3 $\alpha$ -  
412 expressing bacilli. A bacterium was positive for sporulation upon observation of a phase bright  
413 spore. Phase-contrast and fluorescence microscopic images were taken using a Nikon TE300  
414 inverted microscope equipped with a mercury arc lamp, 60 $\times$  Plan-Apochromat 1.4-numerical  
415 aperture objective, cooled digital CCD camera (Quantix Photometrics). Excitation and emission  
416 wavelengths were selected using a 69002 set (Chroma Technology) and a Lambda 10-2 filter  
417 wheel controller. Fluorescence images of Gfpmut3 $\alpha$  were captured with excitation and emission  
418 filters centered at 490nm and 535nm, respectively. Exposures was set at 300ms.

419

420 **Oxidative stress survival:** Wild-type, *asb* mutant, and *dhb* mutant strains were grown in ModG  
421 medium. At eight hours post-inoculation, 500 $\mu$ L of each culture was added to 100 $\mu$ L of either  
422 sterile water or 60mM hydrogen peroxide (final concentration 10mM). Treated (10mM H<sub>2</sub>O<sub>2</sub>)  
423 and control (H<sub>2</sub>O) cultures were incubated for 10 minutes at 37°C then serially diluted in PBS  
424 and plated on BHI to stop the reaction and count CFU/mL. Any culture below the limit of  
425 detection (about 667 CFU/mL), were assigned a conservative value of 600 for data analysis. Data  
426 are pooled from three independent experiments and presented as percent survival: treated divided  
427 by untreated times 100.

428

429 **LAESI-MS:** Samples from ModG medium for LAESI-MS were collected at 12 hours post-  
430 inoculation and separated by centrifugation to obtain the culture medium and cell pellets. Cells  
431 were washed once in an equal volume of PBS. All samples were stored at -80°C until analysis.  
432 Spores for LAESI-MS analysis were prepared as described above. Unless indicated otherwise,  
433 6x10<sup>7</sup> spores from three independent spore preparations in 50% DMSO (or 15 $\mu$ L of cell pellets)

434 were plated in triplicate wells of shallow 96-well plates and subjected to laser-based ablation.  
435 The ESI mass spectrograph was obtained using a ThermoFisher LTQ XL mass spectrometer,  
436 containing an atmospheric pressure ionization stack with a tube lens and skimmer, three  
437 multipoles, a single linear trap configuration and a set of 2 electron multipliers with conversion  
438 dynodes. The mass spectrometer was connected to a Protea LAESI DP-1000 instrument with an  
439 ESI electrospray emitter for ambient ionization. The collected data points were exported to  
440 Gubbs<sup>TM</sup> Mass Spec Utilities (61) and processed using Generic Chromatographic Viewer for  
441 individual  $m/z$  (ThermoFisher Scientific). The average intensity of petrobactin was normalized as  
442 necessary (e.g., OD<sub>600</sub> or 10<sup>6</sup> spores).

443

444 **Sporulation efficiency:** Wild-type, *asb*, *dhb*, and *isd* mutant strains were grown in BHI either  
445 overnight at 30°C then inoculated at 1:1000 into three mL of either ModG medium or  
446 defibrinated bovine blood (Hemostat laboratories). Cultures were grown at 37°C with growth  
447 and sporulation enumerated at regular intervals by serial dilution in PBS prior to plating on BHI  
448 for growth at 37°C overnight. Cultures were plated both before and after a heat treatment step  
449 (30 minutes at 65°C) to obtain total and spores, respectively. CFU/mL below the limit of  
450 detection (~667) were assigned a conservative value of 600 for data analysis. Percent sporulation  
451 is post-heat-treatment divided by the total times 100. Hemin for supplementation was first  
452 suspended at 3.83mM in 1.4M NaOH, then diluted to 150µM in PBS (62). Data are pooled from  
453 three independent experiments unless otherwise noted.

454

455 **Author contributions:** A.K.H. was responsible for project and experiment design, data analysis,  
456 spore harvests, construct design, blood sporulation experiments, and drafting the manuscript.

457 Y.P. completed ModG sporulation and oxidative stress experiments. R.D. and S.C. constructed  
458 reporter plasmids and strains. Z.M. performed microscopy and image processing. A.T. processed  
459 and analyzed petrobactin content by LAESI-MS. D.S., A.T., and P.C.H. provided funding,  
460 resources, and conceptual advice. All authors contributed to the final manuscript. No authors  
461 report a conflict of interest.

462

463 **Funding Information.** Funding for this work was provided by the NIH (R35 GM118101,  
464 D.H.S.; T32 AI00758, A.K.H.), the UM-Israel Partnership for Research (P.C.H.), the UM  
465 Endowment for the Basic Sciences Innovation Initiative (P.C.H., D.H.S, A.T., A.K.H.), UM  
466 Rackham Graduate School (A.K.H.), the American Society for Microbiology Watkins  
467 Fellowship (A.K.H.), and the Hans W. Vahlteich Professorship (D.H.S.). The sponsors had no  
468 role in study design, data collection and interpretation, or the decision to submit the work for  
469 publication

470

471 **Acknowledgements:** Authors would like to thank Dr. Suzanne Dawid for her thoughtful  
472 suggestions regarding manuscript structure and acknowledge Nick Lesniak and Dr. Marc Sze for  
473 their comments. This manuscript was conditionally read by the U.S. Department of Homeland  
474 Security upon acceptance.

475

## References

- 476 1. Dixon TC, Meselson M, Guillemin J, Hanna PC. 1999. Anthrax. *N Engl J Med* 341:815–  
477 826.
- 478 2. Ringertz SH, Hoiby EA, Jensenius M, Maehlen J, Caugant DA, Myklebust A, Fossum K.  
479 2000. Injectional anthrax in a heroin skin-popper. *Lancet* 356:1574–1575.
- 480 3. Guidi-Rontani C, Weber-Levy M, Labruyère E, Mock M. 1999. Germination of *Bacillus*  
481 *anthracis* spores within alveolar macrophages. *Mol Microbiol* 31:9–17.
- 482 4. Brittingham KC, Ruthel G, Panchal RG, Fuller CL, Ribot WJ, Hoover TA, Young HA,  
483 Anderson AO, Bavari S. 2005. Dendritic cells endocytose *Bacillus anthracis* spores:  
484 Implications for anthrax pathogenesis. *J Immunol* 174:5545–5552.
- 485 5. Cote C, Rossi C, Kang A, Morrow P, Lee J, Welkos S. 2005. The detection of protective  
486 antigen (PA) associated with spores of *Bacillus anthracis* and the effects of anti-PA  
487 antibodies on spore germination and macrophage interactions. *Microb Pathog* 38:209–  
488 225.
- 489 6. Cote CK, Welkos SL, Bozue J. 2011. Key aspects of the molecular and cellular basis of  
490 inhalational anthrax. *Microbes Infect* 13:1146–1155.
- 491 7. Ross JM. 1957. The pathogenesis of anthrax following the administration of spores by the  
492 respiratory route. *J Pathol Bacteriol* 73:485–494.
- 493 8. Setlow P. 2006. Spores of *Bacillus subtilis*: Their resistance to and killing by radiation,  
494 heat and chemicals. *J Appl Microbiol* 101:514–525.
- 495 9. Paidhungat M, Setlow B, Driks A, Setlow P. 2000. Characterization of spores of *Bacillus*  
496 *subtilis* which lack dipicolinic acid. *J Bacteriol* 182:5505–5512.
- 497 10. Moeller R, Setlow P, Horneck G, Berger T, Reitz G, Rettberg P, Doherty AJ, Okayasu R,



- 498 Nicholson WL. 2008. Roles of the major, small, acid-soluble spore proteins and spore-  
499 specific and universal DNA repair mechanisms in resistance of *Bacillus subtilis* spores to  
500 ionizing radiation from X rays and high-energy charged-particle bombardment. *J Bacteriol*  
501 190:1134–40.
- 502 11. Turnbull PCB. 1998. Guidelines for the surveillance and control of anthrax in human and  
503 animals. Salisbury, Wiltshire, UK.
- 504 12. Errington J. 2003. Regulation of endospore formation in *Bacillus subtilis*. *Nat Rev*  
505 *Microbiol* 1:117–126.
- 506 13. Kroos L, Yu YT. 2000. Regulation of sigma factor activity during *Bacillus subtilis*  
507 development. *Curr Opin Microbiol* 3:553–560.
- 508 14. Takamatsu H, Watabe K. 2002. Assembly and genetics of spore protective structures. *Cell*  
509 *Mol Life Sci* 59:434–444.
- 510 15. Britton RA, Eichenberger P, Gonzalez-Pastor JE, Fawcett P, Monson R, Losick R,  
511 Grossman AD. 2002. Genome-wide analysis of the stationary-phase sigma factor (sigma-  
512 H) regulon of *Bacillus subtilis*. *J Bacteriol* 184:4881–4890.
- 513 16. Fujita M, Losick R. 2003. The master regulator for entry into sporulation in *Bacillus*  
514 *subtilis* becomes a cell-specific transcription factor after asymmetric division. *Genes Dev*  
515 17:1166–1174.
- 516 17. Eichenberger P, Fawcett P, Losick R. 2001. A three-protein inhibitor of polar septation  
517 during sporulation in *Bacillus subtilis*. *Mol Microbiol* 42:1147–1162.
- 518 18. Rudner DZ, Losick R. 2002. A sporulation membrane protein tethers the pro- $\sigma$ K  
519 processing enzyme to its inhibitor and dictates its subcellular localization. *Genes Dev*  
520 16:1007–1018.

- 521 19. Sun D, Stragier P, Setlow P. 1989. Identification of a new  $\sigma$ -factor involved in  
522 compartmentalized gene expression during sporulation of *Bacillus subtilis*. *Genes Dev*  
523 3:141–149.
- 524 20. Kolodziej BJ, Slepecky RA. 1964. Trace metal requirements for sporulation of *Bacillus*  
525 *megaterium*. *J Bacteriol* 88:821–830.
- 526 21. Purohit M, Sassi-Gaha S, Rest RF. 2010. Rapid sporulation of *Bacillus anthracis* in a high  
527 iron, glucose-free medium. *J Microbiol Methods* 82:282–287.
- 528 22. Haley KP, Skaar EP. 2012. A battle for iron: Host sequestration and *Staphylococcus*  
529 *aureus* acquisition. *Microbes Infect* 14:217–227.
- 530 23. Fuangthong M, Helmann JD. 2003. Recognition of DNA by three ferric uptake regulator  
531 (Fur) homologs in *Bacillus subtilis*. *J Bacteriol* 185:6348–6357.
- 532 24. Troxell B, Hassan HM. 2013. Transcriptional regulation by Ferric Uptake Regulator (Fur)  
533 in pathogenic bacteria. *Front Cell Infect Microbiol* 3.
- 534 25. Jomova K, Valko M. 2011. Importance of iron chelation in free radical-induced oxidative  
535 stress and human disease. *Curr Pharm Des* 17:3460–73.
- 536 26. Tu WY, Pohl S, Gray J, Robinson NJ, Harwood CR, Waldron KJ. 2012. Cellular iron  
537 distribution in *Bacillus anthracis*. *J Bacteriol* 194:932–40.
- 538 27. Bergman NH, Anderson EC, Swenson EE, Niemeyer MM, Miyoshi AD, Hanna PC. 2006.  
539 Transcriptional profiling of the *Bacillus anthracis* life cycle in vitro and an implied model  
540 for regulation of spore formation. *J Bacteriol* 188:6092–6100.
- 541 28. Liu H, Bergman NH, Thomason B, Shallom S, Hazen A, Crossno J, Rasko DA, Ravel J,  
542 Read TD, Peterson SN, Yates III J, Hanna PC. 2004. Formation and composition of the  
543 *Bacillus anthracis* endospore. *J Bacteriol* 186:164–178.

- 544 29. Cendrowski S, MacArthur W, Hanna P. 2004. *Bacillus anthracis* requires siderophore  
545 biosynthesis for growth in macrophages and mouse virulence. *Mol Microbiol* 51:407–17.
- 546 30. Skaar EP, Gaspar AH, Schneewind O. 2006. *Bacillus anthracis* IsdG, a heme-degrading  
547 monooxygenase. *J Bacteriol* 188:1071–1080.
- 548 31. Carlson PE, Dixon SD, Janes BK, Carr KA, Nusca TD, Anderson EC, Keene SE,  
549 Sherman DH, Hanna PC. 2010. Genetic analysis of petrobactin transport in *Bacillus*  
550 *anthracis*. *Mol Microbiol* 75:900–9.
- 551 32. Dixon SD, Janes BK, Bourgis A, Carlson PE, Hanna PC. 2012. Multiple ABC transporters  
552 are involved in the acquisition of petrobactin in *Bacillus anthracis*. *Mol Microbiol*  
553 84:370–82.
- 554 33. Hagan AK, Tripathi A, Berger D, Sherman DH, Hanna PC. 2017. Petrobactin is exported  
555 from *Bacillus anthracis* by the RND-type exporter ApeX. *MBio* 8:1–18.
- 556 34. Hagan AK, Carlson Jr PE, Hanna PC. 2016. Flying under the radar: The non-canonical  
557 biochemistry and molecular biology of petrobactin from *Bacillus anthracis*. *Mol*  
558 *Microbiol* 102:196–206.
- 559 35. Lee JY, Passalacqua KD, Hanna PC, Sherman DH. 2011. Regulation of petrobactin and  
560 bacillibactin biosynthesis in *Bacillus anthracis* under iron and oxygen variation. *PLoS*  
561 *One* 6:e20777.
- 562 36. Passalacqua KD, Bergman NH, Lee JY, Sherman DH, Hanna PC. 2007. The global  
563 transcriptional responses of *Bacillus anthracis* Sterne (34F2) and a Delta *sodA1* mutant to  
564 paraquat reveal metal ion homeostasis imbalances during endogenous superoxide stress. *J*  
565 *Bacteriol* 189:3996–4013.
- 566 37. Sierro N, Makita Y, de Hoon M, Nakai K. 2008. DBTBS: A database of transcriptional

- 567 regulation in *Bacillus subtilis* containing upstream intergenic conservation information.  
568 Nucleic Acids Res 36:D93-6.
- 569 38. Cormack B, Valdivia R, Falkow S. 1998. FACS-optimized mutants of the green  
570 fluorescent protein (GFP). Gene 173:33–38.
- 571 39. Cendrowski S. 2004. Role of the *asb* operon in *Bacillus anthracis* pathogenesis.
- 572 40. Fouet A, Namy O, Lambert G. 2000. Characterization of the operon encoding the  
573 alternative *sigB* factor from *Bacillus anthracis* and its role in virulence. J Bacteriol  
574 182:5036–5045.
- 575 41. Dowds BC. 1994. The oxidative stress response in *Bacillus subtilis*. FEMS Microbiol Lett  
576 124:255–263.
- 577 42. Mols M, Abee T. 2011. Primary and secondary oxidative stress in *Bacillus*. Environ  
578 Microbiol 13:1387–1394.
- 579 43. Dowds BCA, Murphy P, McConnell DJ, Devine KM. 1987. Relationship among oxidative  
580 stress, growth cycle, and sporulation in *Bacillus subtilis*. J Bacteriol 169:5771–5775.
- 581 44. Hugh-Jones M, Blackburn J. 2009. The ecology of *Bacillus anthracis*. Mol Aspects Med  
582 30:356–367.
- 583 45. Minett F. 1950. Sporulation and viability of *B. anthracis* in relation to environmental  
584 temperature and humidity. J Comp Path 60:161–176.
- 585 46. Schaer DJ, Buehler PW, Alayash AI, Belcher JD, Vercellotti GM. 2013. Hemolysis and  
586 free hemoglobin revisited: Exploring hemoglobin and hemin scavengers as a novel class  
587 of therapeutic proteins. Blood 121:1276–1284.
- 588 47. Maresso AW, Garufi G, Schneewind O. 2008. *Bacillus anthracis* secretes proteins that  
589 mediate heme acquisition from hemoglobin. PLoS Pathog 4:e1000132.

- 590 48. Johnstone TC, Nolan EM. 2015. Beyond iron: Non-classical biological functions of  
591 bacterial siderophores. *R Soc Chem* 44:6320–39.
- 592 49. Grandchamp GM, Caro L, Shank EA. 2017. Pirated siderophores promote sporulation in  
593 *Bacillus subtilis*. *Appl Environ Microbiol* AEM.03293-16.
- 594 50. Achard MES, Chen KW, Sweet MJ, Watts RE, Schroder K, Schembri MA, McEwan AG.  
595 2013. An antioxidant role for catecholate siderophores in *Salmonella*. *Biochem J*  
596 454:543–9.
- 597 51. Pohl S, Tu WY, Aldridge PD, Gillespie C, Hahne H, Mäder U, Read TD, Harwood CR.  
598 2011. Combined proteomic and transcriptomic analysis of the response of *Bacillus*  
599 *anthracis* to oxidative stress. *Proteomics* 11:3036–55.
- 600 52. Nobre LS, Saraiva LM. 2014. Role of the siderophore transporter SirABC in the  
601 *Staphylococcus aureus* resistance to oxidative stress. *Curr Microbiol* 69:164–168.
- 602 53. Peralta DR, Adler C, Corbalán NS, Paz García EC, Pomares MF, Vincent PA. 2016.  
603 Enterobactin as part of the oxidative stress response repertoire. *PLoS One* 11:1–15.
- 604 54. Adler C, Corbalan NS, Peralta DR, Pomares MF, De Cristóbal RE, Vincent PA. 2014. The  
605 alternative role of enterobactin as an oxidative stress protector allows *Escherichia coli*  
606 colony development. *PLoS One* 9:1–10.
- 607 55. Tindale AE, Mehrotra M, Ottem D, Page WJ. 2000. Dual regulation of catecholate  
608 siderophore biosynthesis in *Azotobacter vinelandii* by iron and oxidative stress.  
609 *Microbiology* 146:1617–26.
- 610 56. Ollinger J, Song K-B, Antelmann H, Hecker M, Helmann JD. 2006. Role of the Fur  
611 regulon in iron transport in *Bacillus subtilis*. *J Bacteriol* 188:3664–3673.
- 612 57. Serio AW, Pechter KB, Sonenshein AL. 2006. *Bacillus subtilis* aconitase is required for

- 613 efficient late-sporulation gene expression. *J Bacteriol* 188:6396–6405.
- 614 58. Janes BK, Stibitz S. 2006. Routine markerless gene replacement in *Bacillus anthracis*.  
615 *Infect Immun* 74:1949–1953.
- 616 59. Passalacqua KD, Bergman NH. 2006. *Bacillus anthracis*: Interactions with the host and  
617 establishment of inhalational anthrax. *Future Microbiol* 1:397–415.
- 618 60. R Core Team. 2013. R: A language and environment for statistical computing. R  
619 Foundation for Statistical Computing, Vienna, Austria.
- 620 61. Elvebak II LE. 2002. GMSU/QC - Gubbs Mass Spec Utilities. Gubbs, Inc.
- 621 62. Maresso AW, Chapa TJ, Schneewind O. 2006. Surface protein IsdC and Sortase B are  
622 required for heme-iron scavenging of *Bacillus anthracis*. *J Bacteriol* 188:8145–52.
- 623

624 **Figure 1. *asb* mutant spores germinate but fail to sporulate efficiently** A) Wild-type, *dhb*  
625 mutant, and *asb* mutant spores were inoculated in IDM + 1mM inosine at a starting OD<sub>600</sub>  
626 between 0.25 and 0.5. The OD<sub>600</sub> was measured every five minutes for one hour. Data are  
627 presented as percent of initial OD<sub>600</sub> and are representative of n=3. **B-C)** overnight cultures of  
628 wild-type, *asb* mutant ± 25µM petrobactin, and *dhb* mutant bacilli were incubated in three mL of  
629 ModG medium and incubated at 37°C with shaking. At 12 and 36 hours post-inoculation the **B)**  
630 total and **C)** spore CFUs/mL were determined by serial dilution and plating. Data are compiled  
631 from three independent experiments.

632 **Figure 2. The *asb* transcriptional and translational fluorescent reporters illuminate**  
633 **expression during late stage growth.** A) Schematic of putative transcriptional regulator binding  
634 sites (shaded regions) upstream of *asbA* (underlined). The bent arrow denotes the transcriptional  
635 start site in IDM (unpublished data, 34), vertical line indicates start of primer for plasmid-based  
636 reporter. **B-C)** Wild-type and fluorescent reporters were inoculated into ModG (+ 10µg/mL  
637 chloramphenicol as needed) at a starting OD<sub>600</sub> of 0.05. Growth (Left axis, OD<sub>600</sub>) and relative  
638 fluorescence units (Right axis) were measured every five minutes for 12 hours. Data are  
639 representative of three independent experiments. Black arrows indicate late stage expression of  
640 the *asb* operon **B)** genomic-based *asb* transcription and translation *gfpmut3α* fusion reporters **C)**  
641 plasmid-based promoterless *gfpmut3α*, and *asb:gfpmut3α* transcriptional reporters.

642 **Figure 3. Translation of *asb* shuts down during late stage growth while sporulation occurs.**  
643 The *asb* translational reporter strain was grown in ModG sporulation medium with both phase  
644 contrast and Gfpmut3α fluorescent micrographs taken at six, eight, ten, and 12 hours of growth  
645 and the bacteria scored for fluorescence and sporulation. **A)** Pooled data from two replicates of

646 the percent of bacilli fluorescent and/or sporulating over time **B-E)** Representative phase-  
647 contrast and fluorescence images from each time point. **B)** six hours, n=X indicates the number  
648 of bacilli counted per chain. **C)** eight hours **D)** ten hours, examples of scoring for phase bright  
649 spores (white arrows), fluorescent (yellow arrows) and non-fluorescent (red arrows). **E)** 12  
650 hours.

651 **Figure 4. Petrobactin has an intracellular role to protect against oxidative stress and**  
652 **associates with the *B. anthracis* spore.** **A)** LAESI-MS analysis of petrobactin in the  
653 supernatants and cell pellets of wild-type and *asb* mutant strains grown in sporulation medium  
654 for 12 hours. Data are presented as counts per OD<sub>600</sub> and pooled from three independent  
655 experiments. **B)** LAESI-MS analysis of petrobactin in  $6 \times 10^7$  wild-type, and *asb* mutant  $\pm 25 \mu\text{M}$   
656 petrobactin (n=1) spores harvested from ModG medium. **C-D)** Oxidative stress survival by wild-  
657 type, the *asb* mutant strain  $\pm 25 \mu\text{M}$  petrobactin, and the *dhb* mutant strain grown in ModG  
658 medium for eight hours following incubation with either water (untreated) or 10mM H<sub>2</sub>O<sub>2</sub> for ten  
659 minutes at 37°C. Samples were serially diluted and plated to calculate **C)** percent survival from  
660 **D)** CFU/mL. Data are pooled from three independent experiments and analyzed using an  
661 unpaired t-test \*p-value < 0.05.

662 **Figure 5. Petrobactin, but not hemin, is preferred for both growth and sporulation in**  
663 **bovine blood.** Wild-type, the *asb* mutant, the *isd* mutant or the *dhb* mutant (supplemented with  
664 either 25 $\mu\text{M}$  of petrobactin (+PB) or 25 $\mu\text{M}$  hemin (+H) as indicated) were grown in defibrinated  
665 bovine blood. At 24 (black), 48 (dark gray), and 72 (light gray) hours post-inoculation, CFU/mL  
666 was determined for both A) total and B) spores and used to calculate the C) percent sporulation.  
667 Data are compiled from three independent experiments (except for *asb* mutant + 25 $\mu\text{M}$  hemin,



668 n=2) and were analyzed using a two-way ANOVA with a Tukey's multiple comparisons test  
669 \*\*\*p-value $\leq$ 0.001. Dotted lines are placed to facilitate comparisons between strains and time  
670 points.

671 **Figure 6. Proposed model of petrobactin use by *B. anthracis* during late stage growth and**  
672 **early sporulation.**

673 **Supplementary Table 1. Strains of *B. anthracis* Sterne 34F2 used in this work.**

674 **Supplementary Table 2. Primers used to generate mutant strains used in this work.**

675 **Supplementary Figure 7. Phase contrast and fluorescent imaging of wild-type *B. anthracis***

676 **Sterne bacilli during growth in sporulation medium.** The strain was grown in ModG

677 sporulation medium with both phase-contrast and fluorescent (excitation: 490nm and emission:

678 535nm) micrographs taken at six, eight, ten, and 12 hours of growth. Representative images from

679 each time point. **A)** six hours **B)** eight hours **C)** ten hours **D)** 12 hours.

680

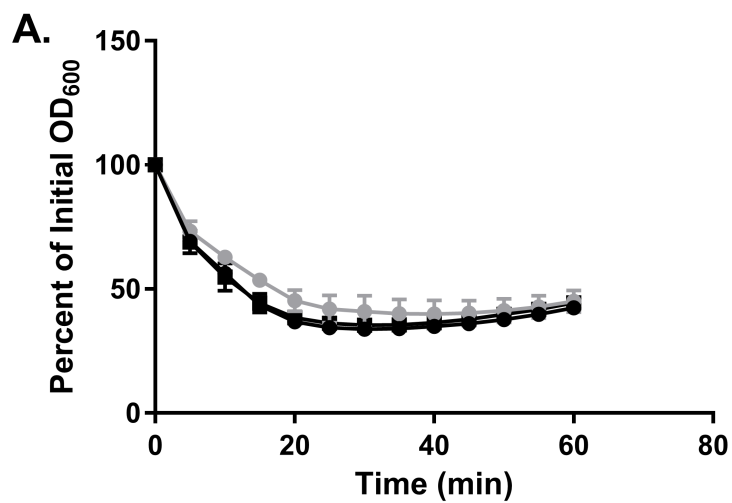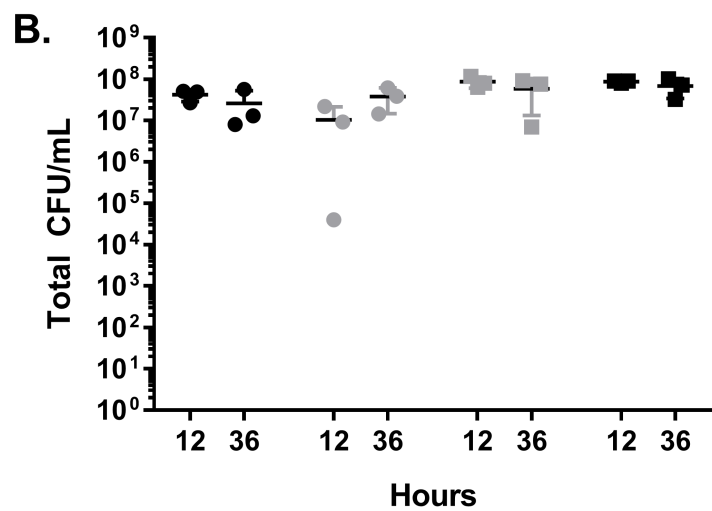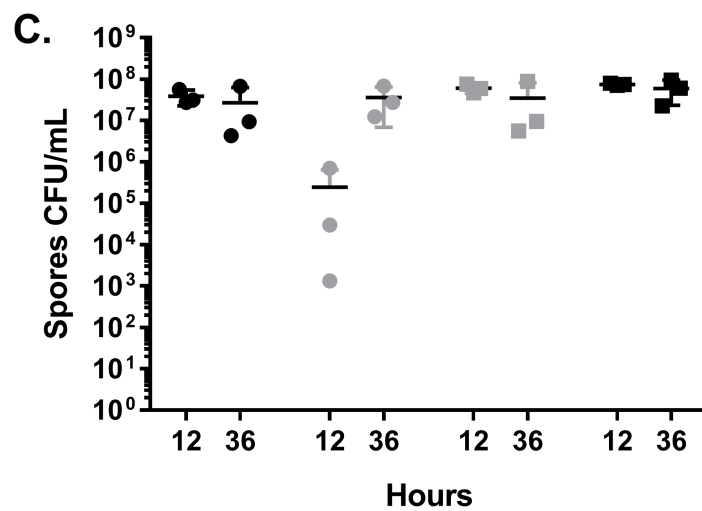

**A.**

5' AAGGAATGAAAATAGGACAAAAGTTATTTCAAGCTTTCTTATCGGATTGTAAAACAATGATATGCAATCGCTATTAGTTTGGGTTGTTACGAATAATCCTTCTAAGAAGTTTTATGAAA  
502 SigK

5' AATTTAATCCAGAAAAAATGGATACGAAATTTTTAGAGCGAGTACAGGTGGAAGAGACAGCGTATTGTTGGAAGAATATAAATAATATTATTATGTAAACTAAATGTTTAAAAGAGGTAT  
382 SigG

5' ACCTCTTTTGTTTAACTATTTTGGATAGATTACTAATGAAAAATAATAAGTATGTAGTTTGAACTGAGTGTTTTTTTCGTGTACTTTTAACTAGATTAAAGAAAAGAGGGAAAACAAGA  
262 SigB

5' AAAATTAATCAGATAAAAAAATTCTGAAATATACTATTGAATTGAATATCGTTATCAATTATAATTATAATTGATAACGATATTCAATTATCGATTGTAATATGAAATCCGATAGTGT  
142 Fur -35 PerR -10 Fur

5' TTATAGAAAGAGGAGGGCAAGTATGAAGCATGCGAAACAAATCGCG  
22 RBS 1

**B.**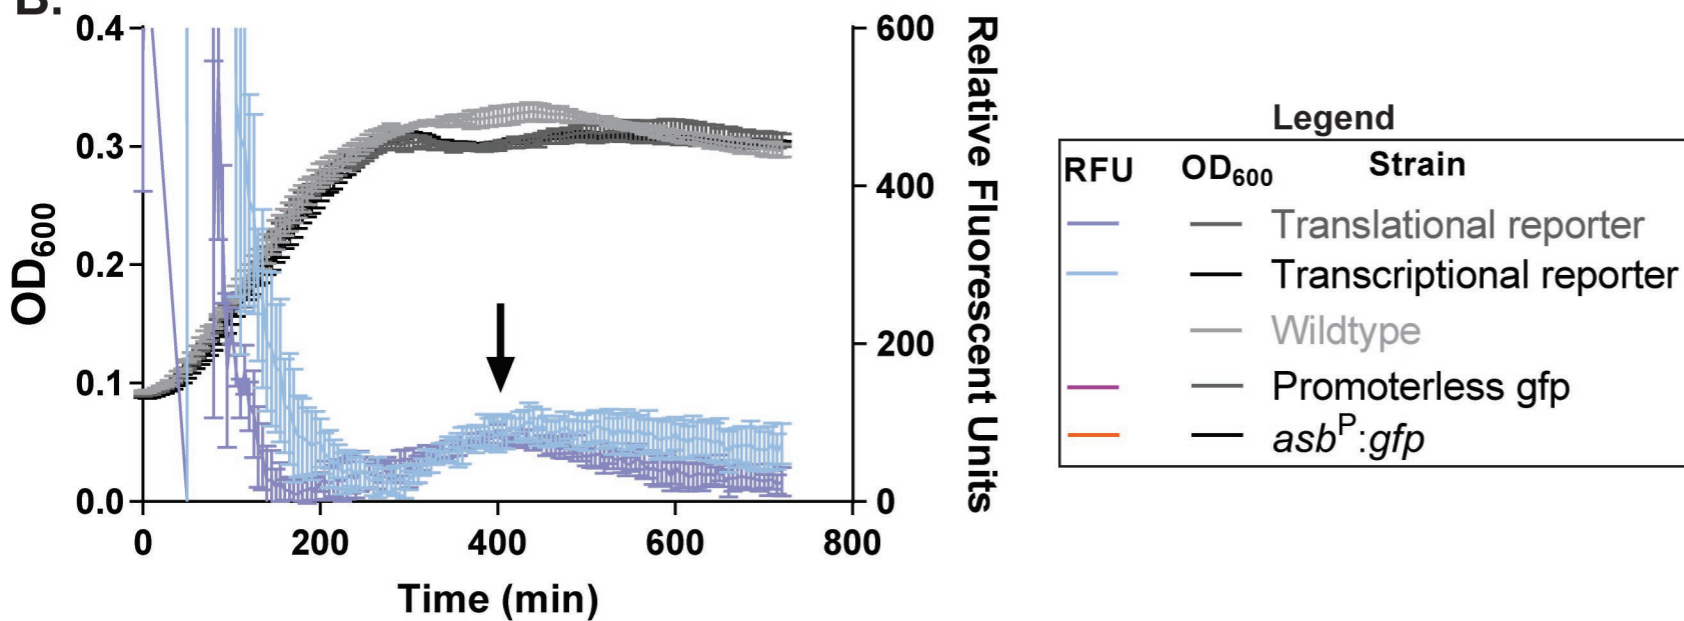**C.**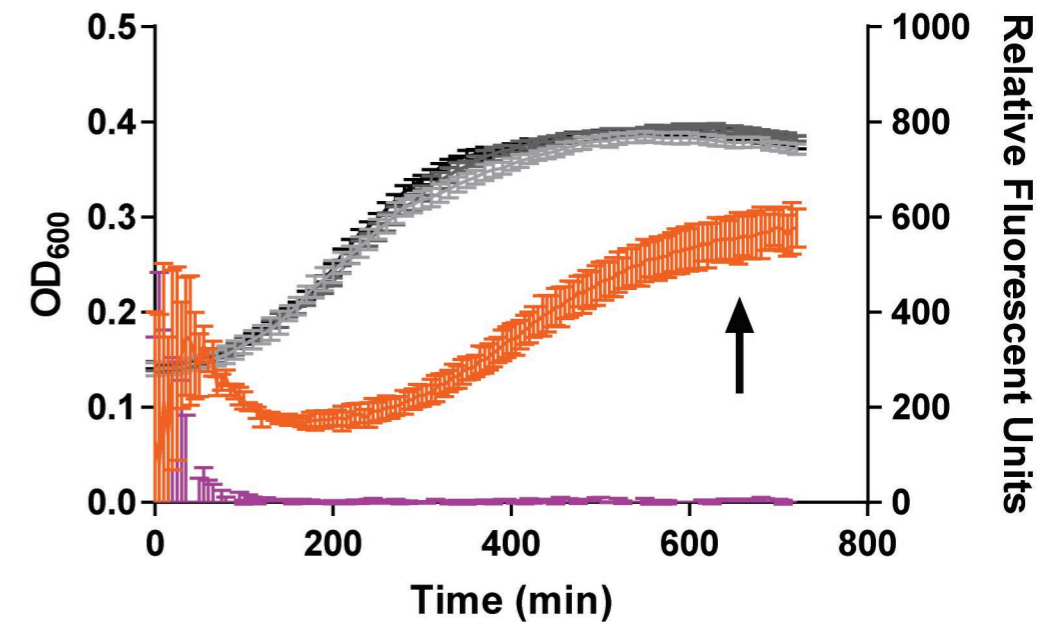

**A.**

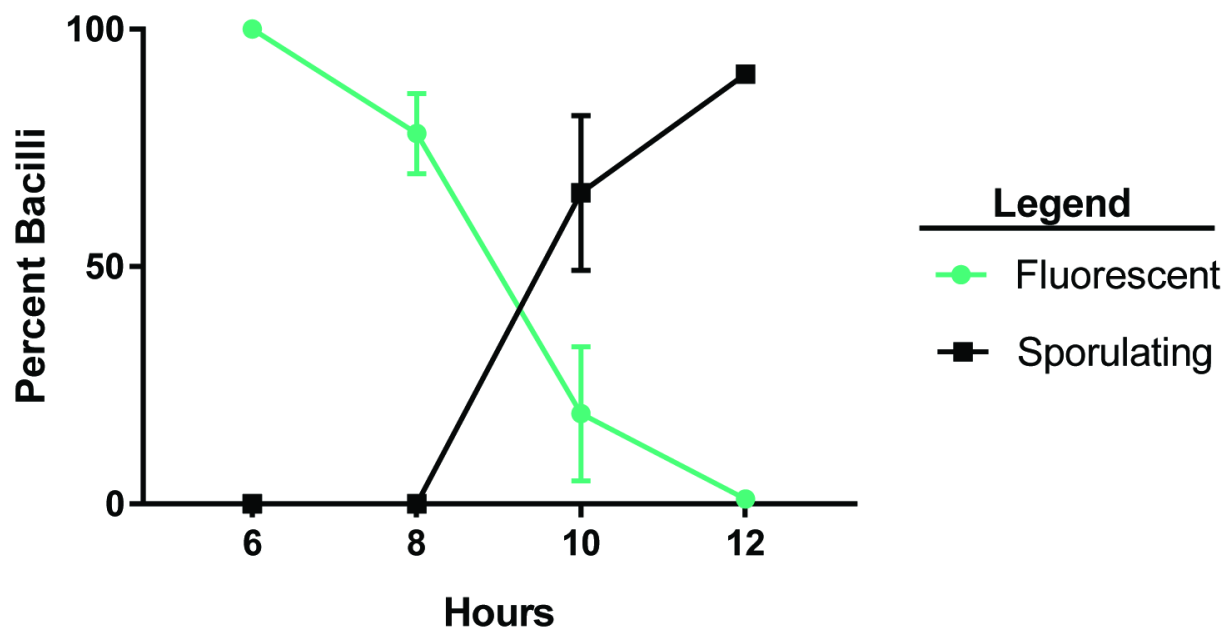

**Phase Contrast**

**Gfpmut3**

**Phase Contrast**

**Gfpmut3**

**B.**

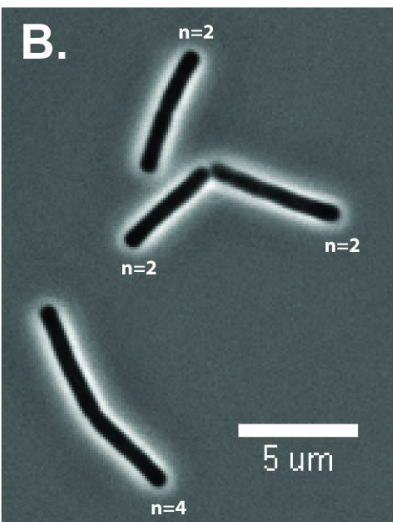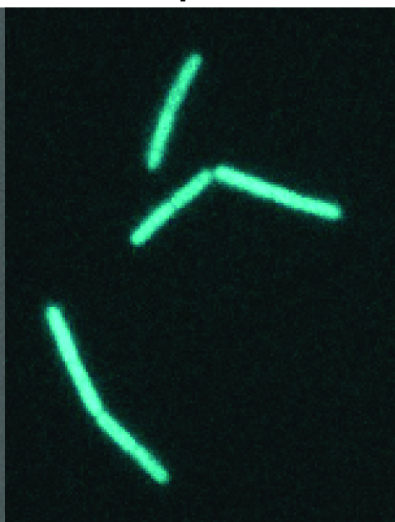

**C.**

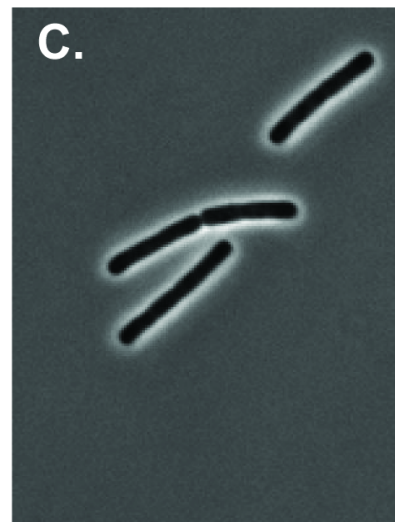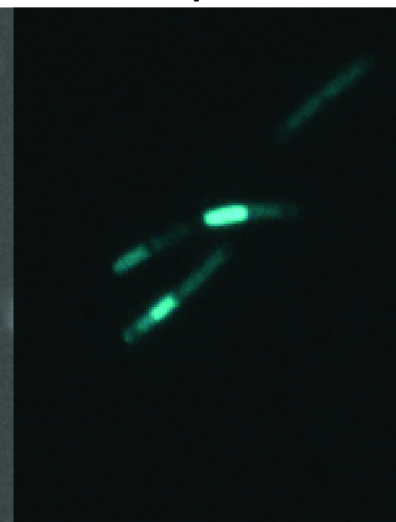

**D.**

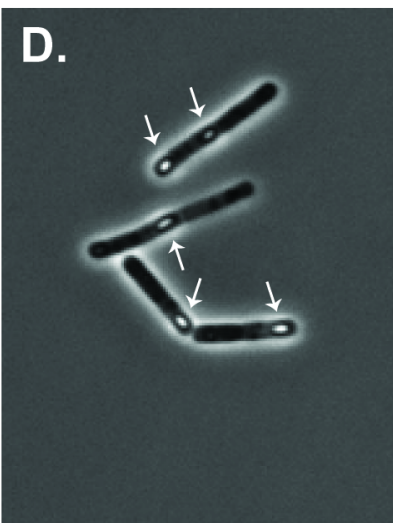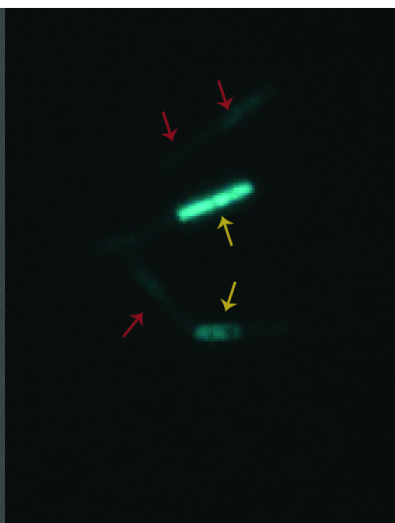

**E.**

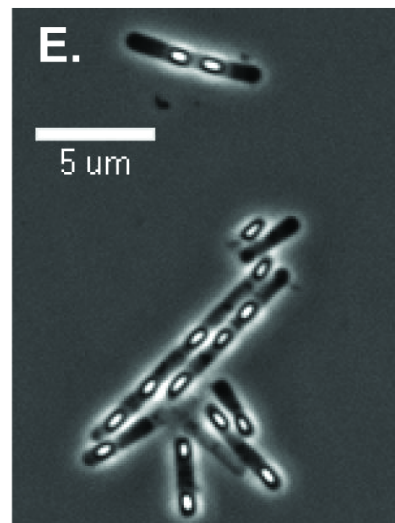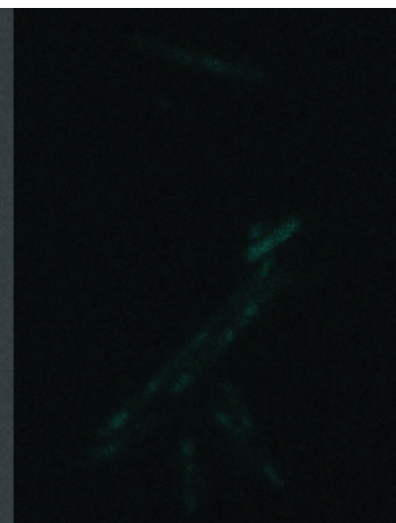

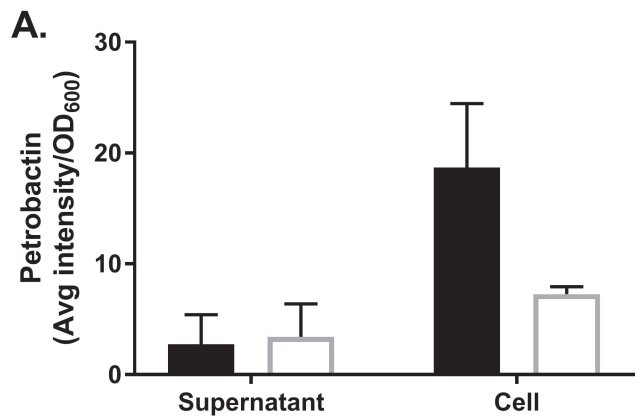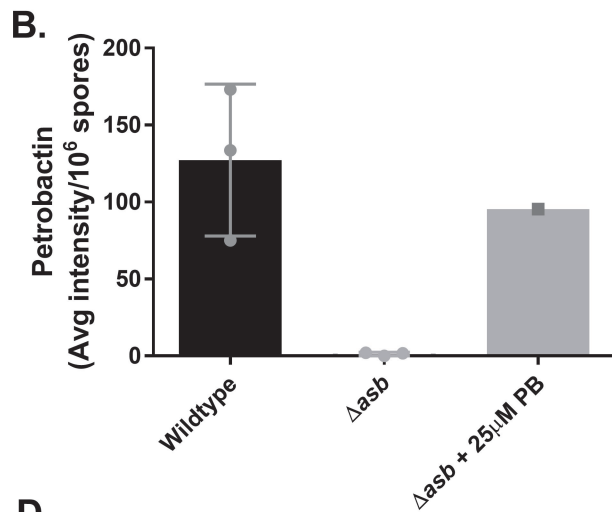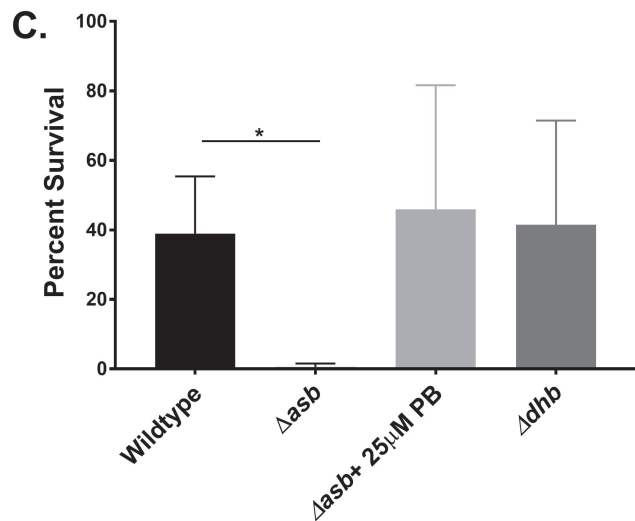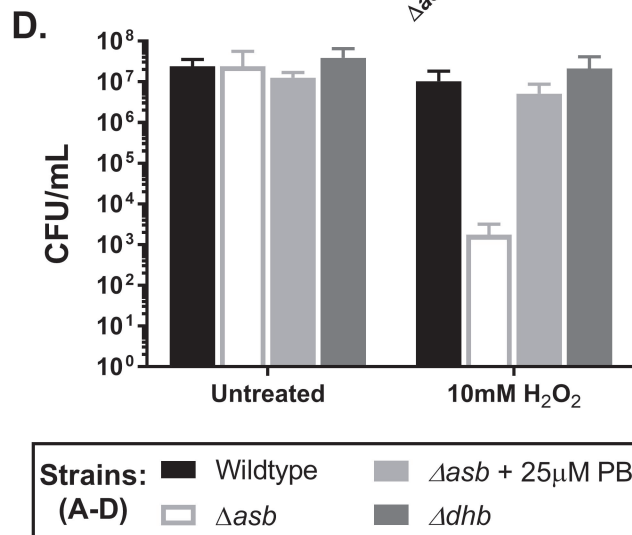

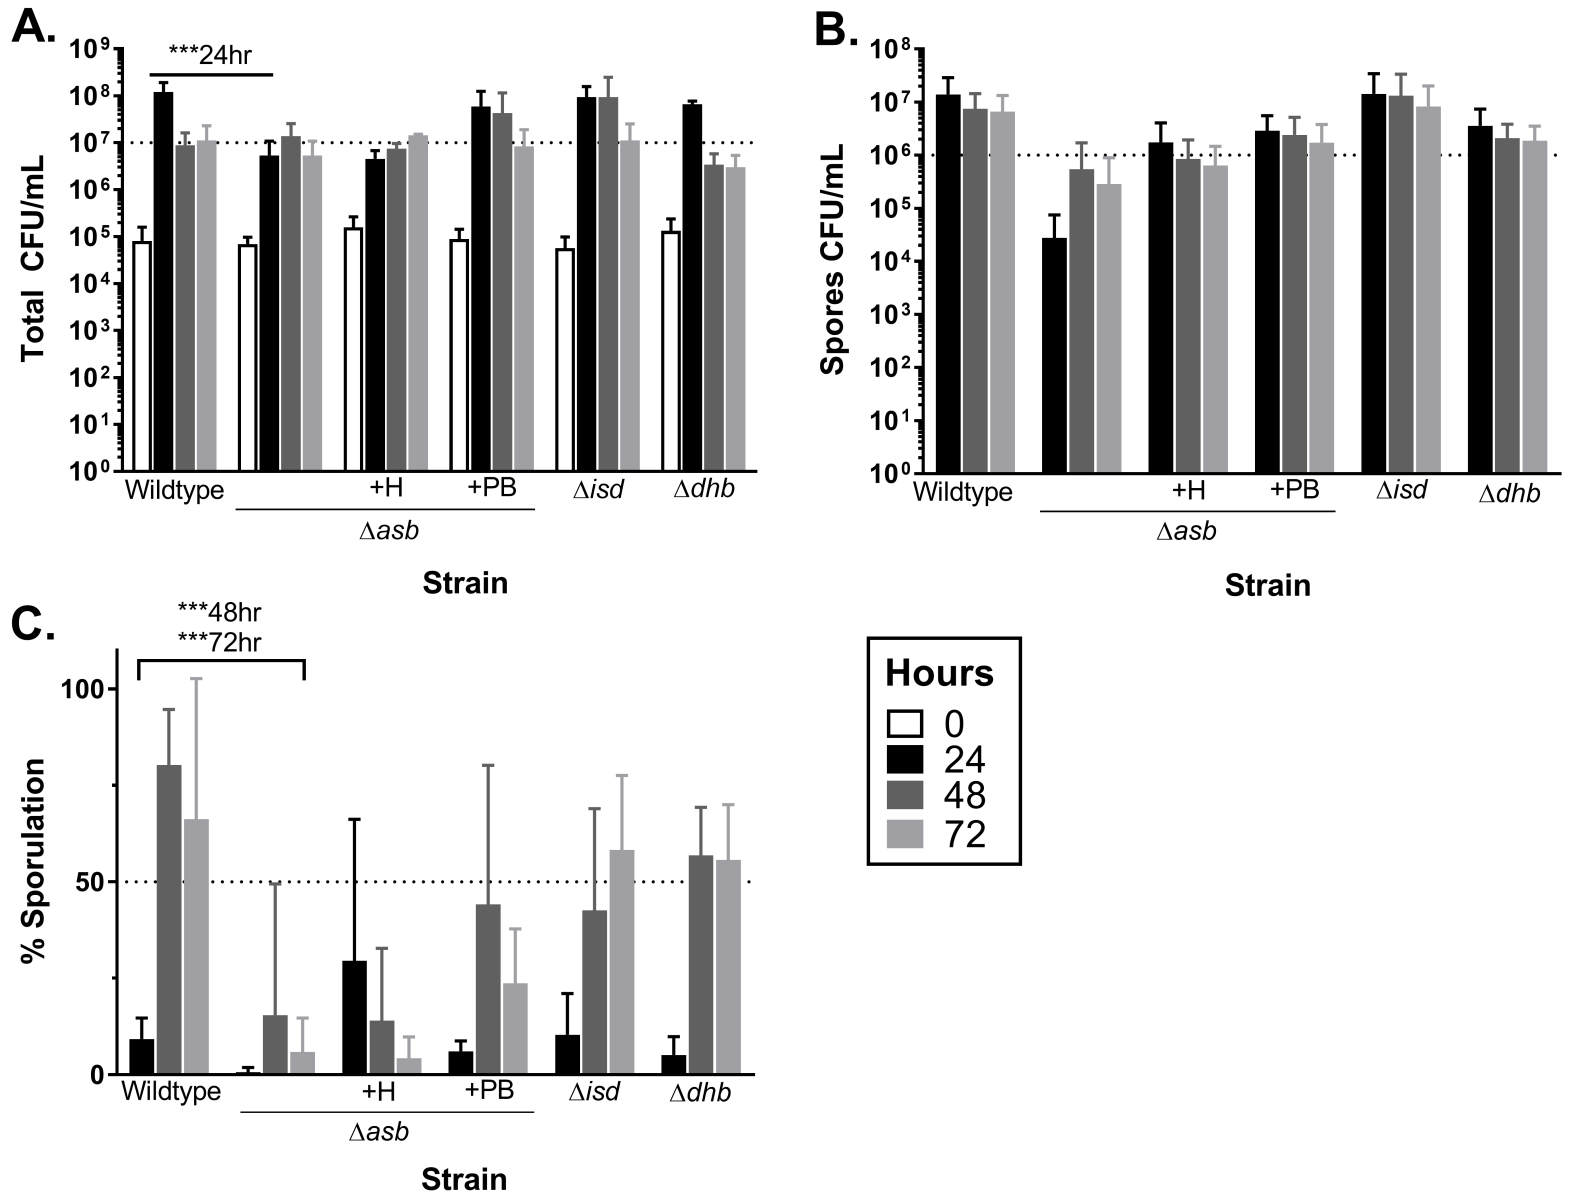

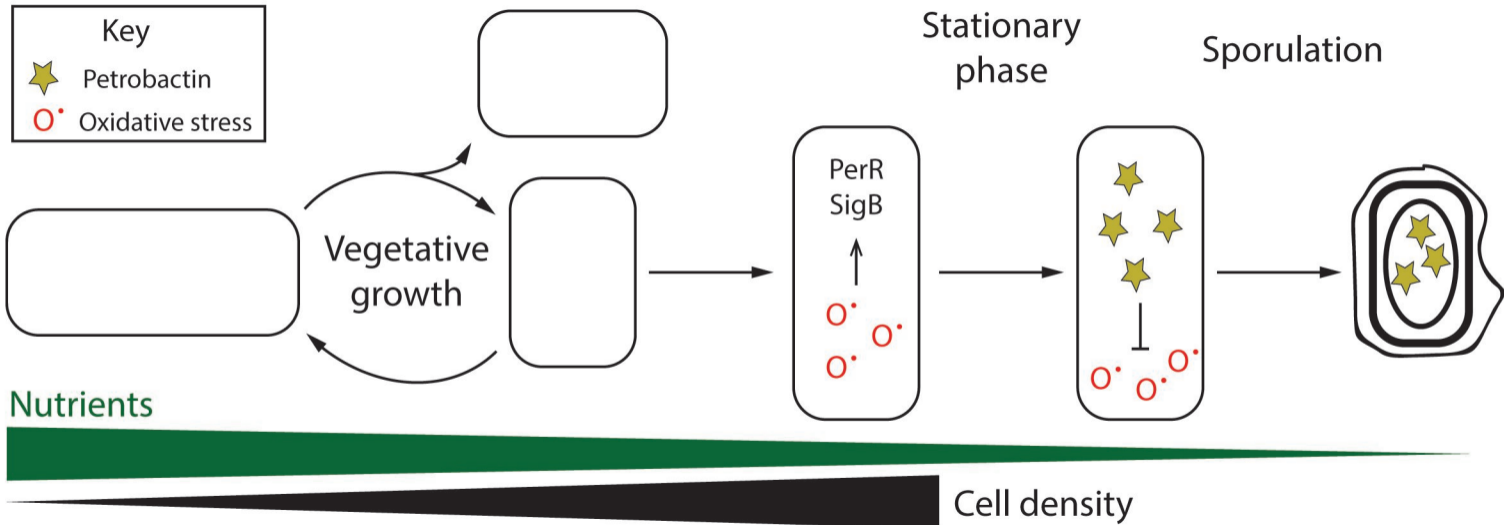

Source: http://biorxiv.org/content/10.1101/350611v1.full.pdf
